# Supplementary material for: What’s in a Name? Species-Wide Whole-Genome Sequencing Resolves Invasive and Noninvasive Lineages of Salmonella enterica Serotype Paratyphi B
Source: PubMed Central journal article supplement (PMC4999539; doi:10.1128/mbio.00527-16), 2016-08-23
Supplement: mbo004162949sf2.pdf [file mbo004162949sf2.pdf]

Figure S2

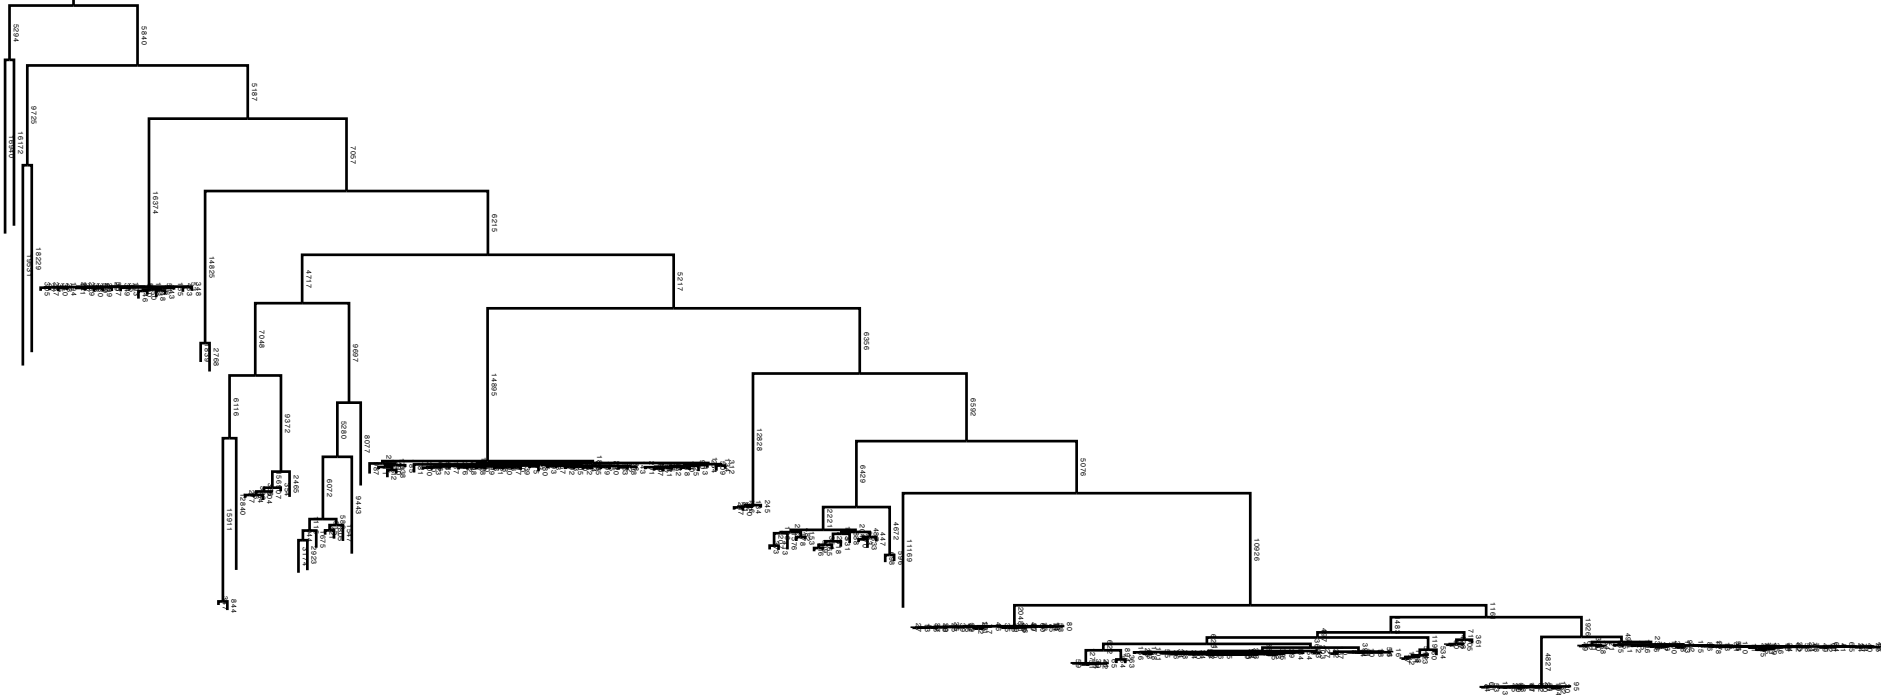

|      | PG1   | PG2   | PG3   | PG4   | PG5   | PG6   | PG7   | PG8   | PG9   | PG10 |
|------|-------|-------|-------|-------|-------|-------|-------|-------|-------|------|
| PG1  | x     |       |       |       |       |       |       |       |       |      |
| PG2  | 5320  | x     |       |       |       |       |       |       |       |      |
| PG3  | 4399  | 8733  | x     |       |       |       |       |       |       |      |
| PG4  | 3902  | 8236  | 1017  | x     |       |       |       |       |       |      |
| PG5  | 5628  | 9962  | 5709  | 4692  | x     |       |       |       |       |      |
| PG6  | 28232 | 32566 | 28313 | 27296 | 26700 | x     |       |       |       |      |
| PG7  | 39002 | 43336 | 39083 | 38066 | 37470 | 27670 | x     |       |       |      |
| PG8  | 48654 | 52988 | 48735 | 47718 | 47122 | 37322 | 35308 | x     |       |      |
| PG9  | 48608 | 52942 | 48689 | 47672 | 47076 | 37276 | 35262 | 30973 | x     |      |
| PG10 | 67393 | 71727 | 67474 | 66457 | 65861 | 56061 | 54047 | 49987 | 49941 | x    |
