# Supplementary material for: What’s in a Name? Species-Wide Whole-Genome Sequencing Resolves Invasive and Noninvasive Lineages of Salmonella enterica Serotype Paratyphi B
Source: PubMed Central journal article supplement (PMC4999539; doi:10.1128/mbio.00527-16), 2016-08-23

Figure S4

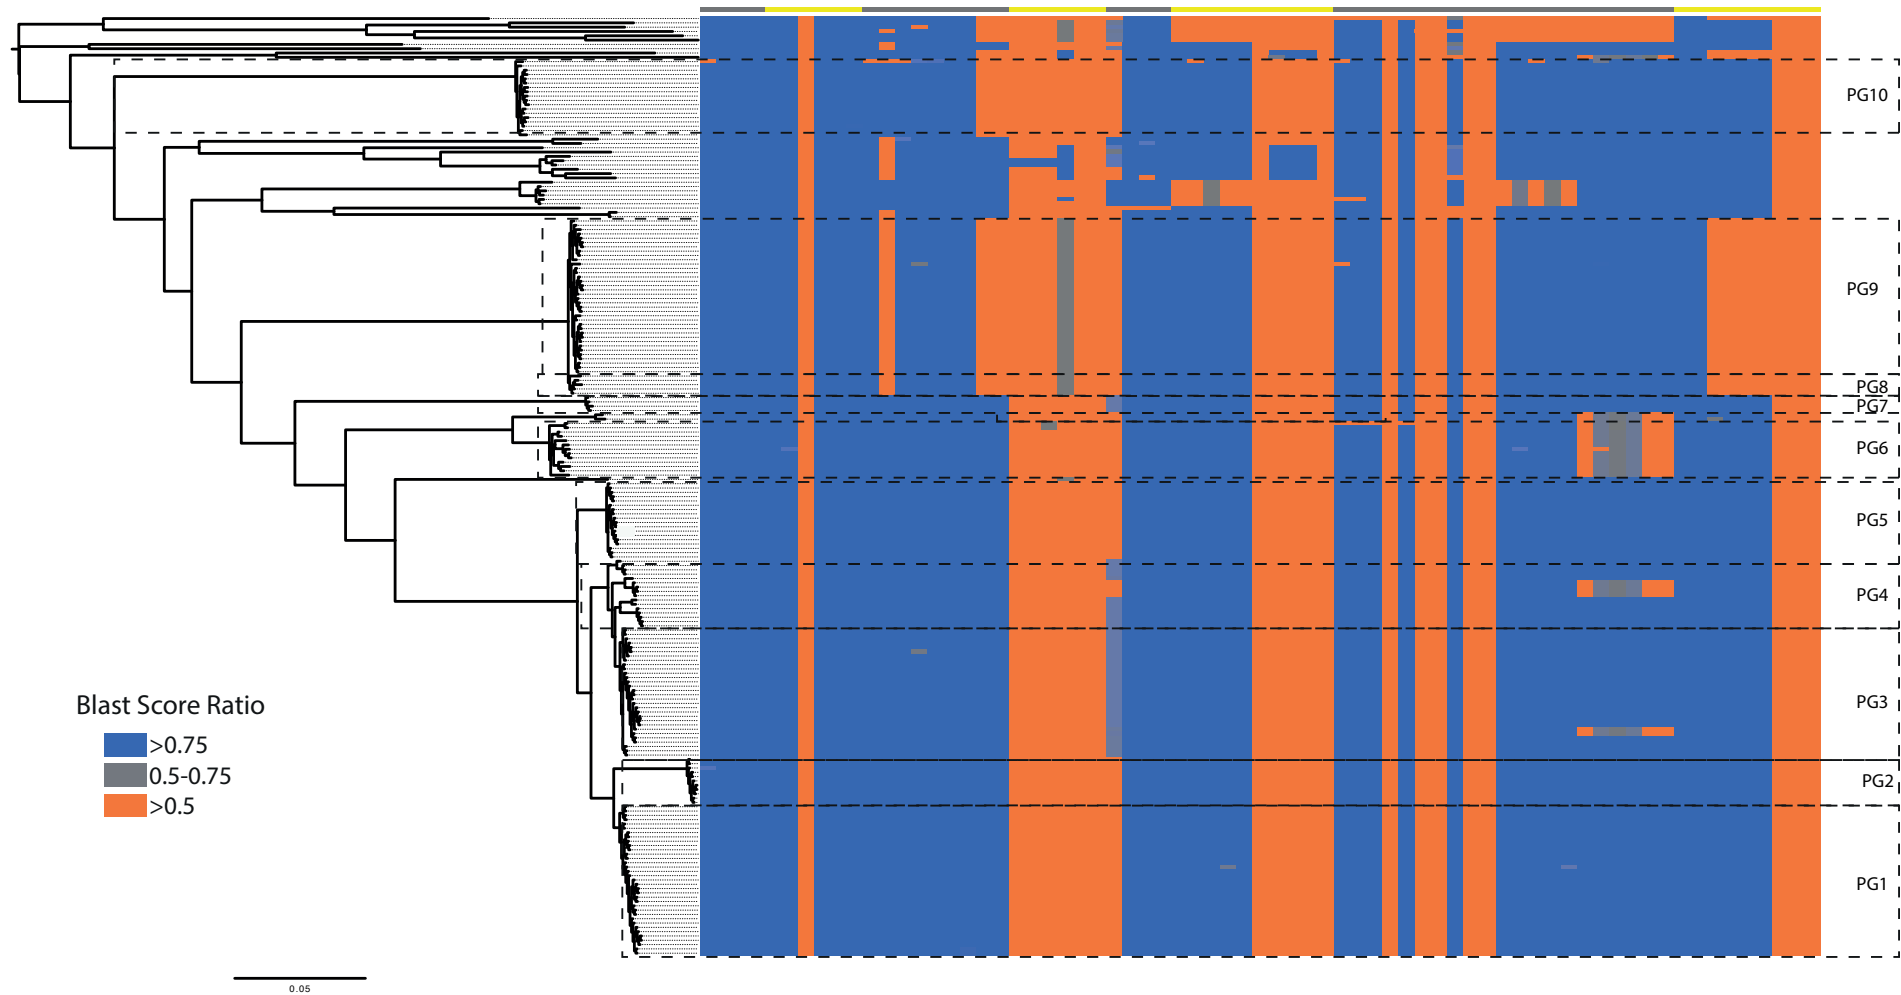

Supplement: mbo004162949sf4.pdf [file mbo004162949sf4.pdf]
